# Supplementary material for: Spastin depletion increases tubulin polyglutamylation and impairs kinesin-mediated neuronal transport, leading to working and associative memory deficits
Source: PLoS Biol. 2020 Aug 31;18(8):e3000820. doi: 10.1371/journal.pbio.3000820 (PMC7485986; doi:10.1371/journal.pbio.3000820)
Supplement: S1 Data — The file “S1_data.xlsx” consists of several spreadsheets. Each spreadsheet contains the numerical raw data of one subfigure as indicated. (XLSX) [file pbio.3000820.s005.xlsx]

## Sheet: Legend
S1 Data. Individual quantitative observations that underlie the data presented in Figure 1. The file „S1_data.xlsx“ consists of several spreadsheets. Each spreadsheet contains the numerical raw data of one subfigure as indicated.

## Sheet: Fig 1D
	Latency to fall (s)
	8 month				14 month
	+/+	+/-	-/-		+/+	+/-	-/-
	186.7	226	245.3		164	92	157.333
	123.7	452.3	268		216	77.6667	162.667
	324.3	180.7	261.3		119.667	97	151
	191	257.7	121.7		120.333	126	78
	422.3	128.7	196.7		149.333	102	189
	139.3	139	218.3		122	141	128
	147	186.3	151.7		122	147	130
	171.7	160.7	78.7		189	45	102
	176.3	148	181.3		153	147	47
	418	262	211		114	102	78
	202.7	252.7	249.3		195	157.333	193.667
	172.7	314.7	227		185.333	237.333	155
	283	419	255.7		121.667	169.667	101.667
	136.3	205	323		210.333	205.333	145
	486	155.3	239.3		202	153	159.667
	253.3	218	123.7		207.667	100
	132	241.3	175.7		196.5	172
	245.7	198.7	252		146	192
	391.3	269.3	150.7		135	131
	175	251.3	294.3		147	97
		133.3	171.3		84
		145	223.3		221
					223
mean	238.915	224.773	209.968		162.775	134.567	131.867
SD	111.523	85.7665	60.5463		41.4931	47.0195	42.5569
s.e.m.	24.9372	18.2855	12.9085		8.65191	10.5139	10.9882

## Sheet: Fig 1E
	Latency to turn (s)
	14 month
	+/+	+/-	-/-
	4.614	24.329	65.736
	3	16.791	6.86
	25.904	5.136	8.78
	8.272	40.327	18.5
	12.2	5.99	38.53
	6.74	13.17	11.84
	5.87	15.17	33.37
	2.75	4.85	19.47
	23.19	2.09	4.83
	7	0.03	31.855
	6.05	2.136	2.137
	4.905	6.21	9.24
	12.839	5.728	6.105
	5.544	7.432	6.313
	25.752	2.096	3.17
	14.047	13.769
	1.584	5.753
	7.623	15.46
	13.63	16.77
	5.33	8.5
	5.16	8.9
	10.28	9.69
	4.47
mean	9.42409	10.4694	17.7824
SD	7.05143	9.01399	17.6817
s.e.m.	1.47032	1.92179	4.56539

## Sheet: Fig 1G
	Hindlimb extension score
	14 month
	+/+	+/-	-/-
	0	0	3
	0	0	3
	1	1	2.5
	1.5	1.5	1
	0.5	0.5	1.5
	0	0	2
	0.5	2	2.5
	1	1.5	3
	3	0	2
	0	1.5	1.5
	0	0	0
	0	1.5	1.5
	0	1.5	1.5
	0	0	2
	1.5	2
		2
		1.5
mean	0.6	0.970588	1.92857
SD	0.87014	0.819119	0.851631
s.e.m.	0.224669	0.198666	0.227608

## Sheet: Fig 1I
	Stride velocity (cm/s)
	14 month
	+/+	+/-	-/-
	10.2429	10.2559	10.8645
	11.5415	10.1319	9.39257
	11.5465	11.2742	10.3198
	13.1432	9.86447	10.6589
	11.4652	10.5849	10.8268
	9.84122	10.6384	9.81635
	9.52056	11.1653	9.873
	10.3272	11.0242	11.0993
	11.4671	9.00556	11.3633
	12.2038	9.98023	10.1708
	10.5	11.1549	11.9333
	10.4085	10.091	9.64006
	9.81684	10.9037	10.0805
	10.2453	10.3366	11.3187
	9.17843	10.0842
		10.2265
		10.1379
mean	10.7632	10.4035	10.5256
SD	1.09127	0.583739	0.745663
s.e.m.	0.281766	0.141577	0.199287

## Sheet: Fig 1J
	Gait angle a (°)
	14 month
	+/+	+/-	-/-
	33.6	44.85	47.6
	40.05	38.9	47.45
	36.9	48.45	39.2
	28.25	34.85	42
	32.65	38.35	37.65
	35.95	48.9	53.3
	38.8	33.4	47.25
	29.05	34.85	36.1
	35.9	37.65	40.75
	48.05	50.2	37
	36.2	37.3	48.2
	40.3	36.2	35.45
	46.65	41.6	42.3
	31.45	43.05	51.75
	39.8	48.5
		42.75
		44.95
mean	36.9067	41.4559	43.2857
SD	5.67186	5.51197	5.93427
s.e.m.	1.46447	1.33685	1.586

## Sheet: Fig 1K
	Hind base width (cm)
	14 month
	+/+	+/-	-/-
	3.5175	4.07555	3.33956
	3.52763	3.24891	3.25626
	3.52922	3.46819	3.45984
	3.07873	3.20895	4.02783
	3.31889	4.23658	4.32604
	3.61093	3.24076	4.6004
	2.89761	3.46581	3.84115
	3.55408	3.16402	3.63738
	3.55388	3.45427	4.05169
	3.8328	3.14235	3.79284
	3.38748	3.6328	3.91054
	3.40954	3.06998	4.27634
	3.36302	3.6165	3.53936
	2.98529	3.51153	4.22227
	3.07276	4.00696
		3.36083
		3.46521
mean	3.37596	3.4923	3.87725
SD	0.261892	0.337887	0.400575
s.e.m.	0.0676203	0.0819497	0.107058

## Sheet: Fig 1M
	Latency (s)
	14 month
	+/+	+/-	-/-
	6.05	38.85	36.75
	8.95	16.1	39.45
	4.8	16.65	60
	5.1	35.35	35.2
	7.6	42.05	60
	6.15	7.3	21.1
	5.5	60	60
	6.35	35.25	36.6
	6.95	7.45	60
	7.45	37.7	60
	34.55	17.35	60
	4.7	14.1	60
	5.5	5.3	60
	6.8	6.2	60
	7.35	5.25	60
	6.1	19.15
	3.4	4.35
	4.65	6.6
	6.7	6.65
	5	6.4
	4.2	6.45
	5.35	12.65
mean	7.23636	18.5068	51.2733
SD	6.2356	15.7527	13.3533
s.e.m.	1.32943	3.35849	3.44781

## Sheet: Fig 1N
	Number of footslips
	14 month
	+/+	+/-	-/-
	5.5	22.5	37
	6.5	12	22
	0.5	43.5	30
	0.5	0	21.5
	2.5	33	33
	2	0.5
	6.5	5
	4	3
	10.5	30
	3.5	13
	1	13.5
	0.5	4.5
	3	2.5
	2	3
	11.5	28
	5	0.5
	0.5	5
	2.5	5.5
	7	0.5
	2.5	3
	3	17.5
	4.5
mean	3.86364	11.7143	28.7
SD	3.0713	12.7	6.81542
s.e.m.	0.654804	2.77136	3.04795

## Sheet: Fig 1O
	% Failure
	14 month
	+/+	+/-	-/-
	0	4.54545	66.6667

[truncated: 3 more sheets: Fig 1Q, Fig 1R, Fig 1U]
