# Supplementary material for: Spastin depletion increases tubulin polyglutamylation and impairs kinesin-mediated neuronal transport, leading to working and associative memory deficits
Source: PLoS Biol. 2020 Aug 31;18(8):e3000820. doi: 10.1371/journal.pbio.3000820 (PMC7485986; doi:10.1371/journal.pbio.3000820)
Supplement: S4 Data — The file “S4_data.xlsx” consists of several spreadsheets. Each spreadsheet contains the numerical raw data of one subfigure as indicated. (XLSX) [file pbio.3000820.s008.xlsx]

## Sheet: Legend
S4 Data. Individual quantitative observations that underlie the data presented in Figure 4. The file „S4_data.xlsx“ consists of several spreadsheets. Each spreadsheet contains the numerical raw data of one subfigure as indicated.

## Sheet: Fig 4C
Fig. 4C		Local field potential (% of control)
		Wild type										Spastin KO
	Recording #	1	2	3	4	5	6	7	Mean	S.E.M.		1	2	3	4	5	6	7	8	9	Mean	S.E.M.	T-test
	Time (min)																						(p= )
	0.5	101.275	93.7001	106.397	109.26	81.1237	92.151	101.144	97.8643	3.36632		103.682	111.375	112.109	95.5151	94.6485	99.642	99.8678	98.8616	106.306	102.445	2.12697	n.d.	not determined
	1	103.632	89.4846	109.817	112.834	91.699	83.1661	103.605	99.1769	3.9003		105.238	108.99	114.219	90.9284	91.0271	101.287	99.2899	101.587	104.246	101.868	2.54011	n.d.
	1.5	102.115	89.4351	111.744	112.445	89.2914	106.051	109.163	102.892	3.45702		102.701	107.89	111.695	99.7989	91.9522	98.6222	97.2036	98.9717	104.955	101.532	1.9907	n.d.
	2	96.3741	91.0282	99.9277	109.045	87.0483	92.9746	104.152	97.2214	2.69449		105.208	109.097	105.21	94.4202	92.4023	94.9949	99.9318	99.1348	102.219	100.291	1.88511	n.d.
	2.5	100.431	94.5754	100.155	109.199	93.3099	99.0079	107.714	100.627	2.1032		102.55	108.177	117.368	93.9876	94.1893	97.7895	99.5504	99.2752	102.332	101.691	2.44452	n.d.
	3	102.752	89.962	105.782	102.969	85.81	90.3036	99.6518	96.7473	2.75542		102.103	106.296	111.149	98.6854	89.9759	98.165	96.2588	100.818	99.7591	100.357	1.99833	n.d.
	3.5	100.387	94.3533	110.309	103.705	84.9231	97.3047	107.011	99.7133	2.98017		102.807	107.626	111.576	93.0315	91.9458	99.2339	98.3151	98.7814	105.977	101.033	2.18743	n.d.
	4	101.595	93.0543	113.244	112.361	80.7473	95.9632	106.044	100.43	4.04361		100.599	107.588	116.283	94.3604	95.8576	99.1805	103.002	101.516	106.869	102.806	2.23715	n.d.
	4.5	95.9273	91.6128	100.11	105.92	80.635	100.175	98.8274	96.1725	2.8423		103.746	107.361	112.735	94.7854	93.1023	96.4432	102.5	99.3762	102.459	101.39	2.08542	n.d.
	5	99.7606	100.296	110.785	110.207	80.9519	95.5419	100.085	99.6611	3.50671		101.38	107.281	109.428	96.1673	97.382	96.3917	100.03	101.611	107.145	101.868	1.66914	n.d.
	5.5	93.8769	99.067	98.9055	101.714	89.7412	87.4782	99.1349	95.7026	1.89528		100.969	107.013	106.941	96.2835	93.6921	98.7884	97.7505	100.614	105.387	100.827	1.58851	n.d.
	6	92.8508	93.7939	106.161	99.9821	83.1939	106.43	104.536	98.1354	3.02241		101.296	107.932	115.549	97.4592	91.6963	97.7312	101.718	103.238	106.523	102.571	2.30756	n.d.
	6.5	97.8612	94.375	109.08	108.283	86.2626	87.7173	104.499	98.2969	3.27887		100.74	104.616	112.545	97.9019	92.1051	92.2236	98.324	101.297	104.89	100.516	2.14877	n.d.
	7	101.744	92.3443	103.917	103.801	84.4316	85.295	105.7	96.7475	3.2214		101.037	104.958	112.411	93.8529	98.7076	95.8398	100.745	100.218	103.613	101.265	1.80938	n.d.
	7.5	98.1236	92.9123	105.59	102.715	85.2151	94.5345	99.0051	96.8708	2.36164		101.228	106.24	109.819	99.8889	96.2155	97.8711	98.303	101.239	105.846	101.85	1.50692	n.d.
	8	102.093	100.207	100.161	107.551	93.1848	96.5416	104.487	100.604	1.6749		100.042	104.102	112.673	101.655	96.1751	95.6095	104.088	99.8255	104.986	102.128	1.72763	n.d.
	8.5	98.0764	97.2934	101.855	101.131	83.7877	101.271	109.195	98.9442	2.69899		100.767	100.577	109.563	99.2804	93.5075	94.7087	100.661	99.2188	101.709	99.9991	1.52304	n.d.
	9	99.0257	97.2153	103.343	98.8342	93.8336	88.4269	106.622	98.1858	2.08988		99.7112	105.442	101.706	100.036	101.202	96.9383	102.079	100.466	102.107	101.076	0.763566	n.d.
	9.5	94.6008	95.2972	111.641	100.832	86.455	91.2049	103.128	97.594	2.91916		101.609	104.194	102.55	100.061	98.0688	95.6178	101.294	102.547	103.244	101.021	0.904695	n.d.
	10	99.0725	100.01	105.952	99.9199	95.6869	93.7731	101.584	99.4283	1.3842		100.805	100.522	99.876	98.6055	100.083	97.7841	99.0293	99.9476	105.519	100.241	0.732935	n.d.
	10.5	99.211	99.3247	106.638	102.782	99.1761	101.681	99.8538	101.238	0.965527		101.094	102.971	100.909	100.55	97.3379	95.2412	100.09	101.309	106.319	100.647	1.04599	n.d.
	11	99.2503	99.0112	100.595	100.769	98.7401	100.373	98.8161	99.6506	0.311608		101.073	102.124	105.529	98.8798	92.2312	97.1278	100.149	101.884	102.727	100.192	1.27354	n.d.
	11.5	98.9269	96.2395	105.82	100.716	93.4233	100.026	100.136	99.3268	1.35357		100.885	103.946	113.897	102.029	97.1424	96.7498	100.717	101.478	102.028	102.097	1.66488	n.d.
	12	101.894	99.5915	105.825	102.86	95.9788	111.587	96.4542	102.027	1.91711		100.739	101.225	105.464	101.439	95.2142	96.7265	97.46	100.999	100.952	100.024	1.02705	n.d.
	12.5	103.136	101.904	104.263	106.048	97.226	100.057	94.4388	101.01	1.42639		100.459	101.445	103.645	100.583	104.672	99.9734	100.505	100.14	103.473	101.655	0.594375	n.d.
	13	101.213	99.5523	102.957	100.649	95.8026	103.883	101.407	100.78	0.91748		97.5406	102.149	104.817	102.966	99.7075	99.9083	99.0897	99.7817	100.168	100.681	0.740621	n.d.
	13.5	99.2238	99.887	101.311	99.8436	92.2712	95.1336	89.144	96.6878	1.60887		100.591	98.913	102.008	93.7898	97.533	99.0624	100.541	98.8545	99.0052	98.922	0.774872	n.d.
	14	100.217	98.4834	100.747	101.399	101.21	102.506	99.3832	100.564	0.468659		99.7206	100.151	102.663	102.072	99.8183	98.1704	98.5988	100.225	101	100.269	0.489214	n.d.
	14.5	100.378	100.186	99.2152	101.55	106.232	106.804	105.115	102.783	1.10916		100.98	100.254	94.5347	97.8607	100.065	103.982	101.692	98.8193	98.9225	99.6789	0.88049	n.d.
	15	98.9679	101.892	95.769	96.559	104.484	91.6736	104.952	99.1853	1.71245		101.168	98.533	95.9764	103.312	102.876	98.8773	100.079	81.8615	100.904	98.1763	2.17339	n.d.
	15.5	99.9014	98.3284	97.5592	101.996	101.04	104.751	98.7909	100.338	0.869698		100.545	95.7697	101.535	102.889	100.626	96.5778	97.0597	101.554	99.9669	99.6138	0.839306	n.d.
(Time of theta burst)
	16	155.71	137.279	179.012	172.425	140.059	156.766	162.385	157.662	5.39466		178.404	153.108	128.959	113.202	138.119	145.109	132.652	113.5	137.663	137.857	6.70484	0.04656
	16.5	151.465	136.684	176.091	162.082	132.819	166.009	154.458	154.23	5.44411		169.929	147.966	123.376	113.47	130.55	145.957	135.156	118.179	142.143	136.303	5.82784	0.04457
	17	158.604	136.016	173.97	174.64	130.749	153.127	152.503	154.23	5.91208		166.376	143.164	116.913	116.571	132.461	146.413	132.407	120.123	140.5	134.992	5.41714	0.03628
	17.5	152.417	137.785	173.063	170.098	132.923	166.811	148.621	154.531	5.57557		162.85	141.562	114.569	111.147	136.965	142.29	132.674	122.599	139.763	133.824	5.31182	0.02147
	18	152.787	137.117	170.142	173.235	133.503	161.233	157.8	155.117	5.33609		162.879	141.799	116.69	118.072	140.318	144.051	131.695	122.231	140.356	135.343	4.94003	0.02134
	18.5	154.123	134.832	169.774	165.431	134.717	157.632	140.531	151.006	5.05197		161.603	138.092	117.002	117.096	137.931	139.406	133.166	124.342	138.68	134.147	4.58515	0.03355
	19	148.88	137.869	168.774	161.409	127.719	155.333	128.804	146.97	5.60784		159.708	137.733	115.831	105.472	128.452	136.281	132.873	123.05	136.175	130.62	5.107	0.05909
	19.5	153.927	131.386	163.757	167.248	130.653	143.388	129.374	145.676	5.64457		157.83	137.807	114.46	118.955	127.87	141.14	128.056	121.726	135.61	131.495	4.4272	0.08969
	20	153.099	134.302	176.007	158.794	134.641	151.07	133.542	148.779	5.54608		159.562	139.364	107.933	114.398	130.214	135.12	128.709	125.101	137	130.822	4.98162	0.03722
	20.5	140.565	133.607	163.458	159.488	133.148	151.063	133.277	144.944	4.55066		153.209	133.926	116.864	114.421	128.282	138.581	128.948	124.096	137.294	130.625	3.96437	0.03972
	21	142.545	126.939	161.806	153.47	124.536	135.161	126.58	138.719	5.08141		153.988	137.725	106.551	113.004	129.475	135.664	128.125	126.15	135.815	129.611	4.65024	0.22294
	21.5	141.845	134.729	160.149	149.074	127.252	139.633	129.266	140.278	4.03258		152.347	134.065	102.217	119.487	123.465	131.705	128.857	126.552	131.348	127.783	4.43264	0.05983
	22	136.454	127.15	161.308	149.394	125.214	135.085	118.961	136.224	5.16183		153.051	133.823	103.716	116.365	127.085	127.615	125.021	124.87	137.836	127.709	4.56766	0.26672
	22.5	136.535	127.657	157.907	139.748	124.089	138.188	113.474	133.942	4.92454		151.488	133.991	104.716	110.246	123.715	125.807	129.092	125.624	133.819	126.5	4.5469	0.31354
	23	143.058	132.937	159.78	147.286	124.336	149.543	113.006	138.564	5.632		149.021	131.65	112.93	107.529	117.124	126.446	123.938	125.073	133.476	125.243	4.09726	0.09621
	23.5	143.036	129.877	146.165	141.373	128.648	128.461	116.212	133.396	3.70925		146.496	135.919	112.704	111.378	126.812	126.855	127.189	126.41	131.978	127.305	3.59877	0.2719
	24	140.756	135.433	151.206	138.328	117.176	137.983	123.891	134.967	3.93054		147.789	131.274	113.314	109.364	126.513	127.046	122.995	128.603	128.875	126.197	3.66166	0.12593
	24.5	135.373	130.895	145.228	139.765	133.018	138.479	127.232	135.713	2.10504		148.257	131.451	103.892	110.462	125.555	123.537	125.549	125.199	129.467	124.819	4.18634	0.04342
	25	137.98	129.55	149.232	138.429	119.049	136.26	119.463	132.852	3.82795		148.398	134.575	107.836	111.428	121.255	122.507	123.637	127.182	130.302	125.236	4.03533	0.21886
	25.5	136.655	128.411	150.321	137.421	131.985	138.036	128.021	135.836	2.66835		149.523	130.11	105.417	116.22	129.958	122.341	125.38	128.29	129.673	126.324	3.97349	0.06468
	26	131.254	125.725	146.25	139.083	133.549	136.234	116.383	132.64	3.36399		149.485	133.494	110.404	112.79	120.037	122.62	126.049	127.183	128.768	125.648	3.87369	0.20928
	26.5	136.09	127.695	148.282	140.428	128.028	151.51	122.07	136.301	3.87815		148.305	130.572	111.042	115.449	127.306	123.725	123.82	126.492	128.698	126.157	3.48095	0.09185
	27	122.835	128.373	148.969	144.351	133.243	126.161	116.413	131.478	4.07659		148.644	131.747	108.449	113.041	127.691	128.961	125.029	126.085	128.876	126.502	3.80122	0.41925
	27.5	131.44	131.965	145.378	135.321	123.842	128.323	119.664	130.848	2.90415		145.703	130.001	114.7	112.921	125.482	121.455	125.244	125.611	129.219	125.593	3.19176	n.d.
	28	127.192	124.966	148.307	141.74	131.058	139.045	117.974	132.897	3.71152		144.68	132.102	109.669	117.138	126.983	123.442	129.383	125.059	128.947	126.378	3.24613	n.d.
	28.5	126.415	128.681	145.905	144.616	131.157	129.359	111.231	131.052	4.10942		151.074	131.041	106.975	114.507	125.105	128.146	125.802	126.879	125.99	126.169	4.00371	n.d.
	29	126.581	126.676	144.53	133.914	128.023	127.791	123.354	130.124	2.48271		148.714	131.054	111.647	115.749	127.695	121.233	123.375	127.325	129.293	126.232	3.52993	n.d.
	29.5	113.023	125.878	146.097	139.092	124.926	127.606	114.689	127.33	4.19665		150.044	132.549	112.708	114.242	127.205	127.271	125.772	126.276	128.727	127.199	3.60103	n.d.
	30	131.149	127.845	148.652	136.127	130.204	122.023	119.378	130.768	3.39204		147.926	127.741	114.924	109.065	129.096	128.089	121.588	128.74	129.444	126.29	3.62338	n.d.
	30.5	115.384	127.519	146.731	143.377	131.297	135.3	108.845	129.779	4.85629		145.056	129.779	117.771	115.58	124.306	121.98	123.458	130.538	128.467	126.326	2.89861	n.d.
	31	118.913	125.132	148.286	139.479	137.801	135.282	112.151	131.006	4.45172		148.602	130.325	112.648	117.254	125.351	123.678	123.095	127.898	128.527	126.375	3.34855	n.d.
	31.5	119.759	126.606	145.905	142.526	126.053	142.091	114.541	131.068	4.33076		149.517	128.121	121.422	110.326	128.956	124.192	123.503	126.785	128.493	126.813	3.42237	n.d.
	32	125.702	126.848	142.617	133.002	131.68	115.648	105.765	125.895	4.22517		148.068	129.186	123.325	114.263	123.989	127.715	124.791	126.736	127.374	127.272	2.97762	n.d.
	32.5	121.877	131.672	145.837	132.749	132.152	118.957	114.306	128.221	3.7195		148.129	132.115	125.055	112.363	126.417	122.584	122.859	128.375	128.996	127.433	3.18811	n.d.
	33	116.8	135.138	142.518	139.748	127.392	123.921	119.197	129.245	3.52484		149.004	130.582	118.887	114.933	127.17	126.808	121.745	126.216	128.211	127.062	3.20199	n.d.
	33.5	126.459	126.375	137.875	145.862	137.718	118.792	111.592	129.239	4.18769		151.532	130.886	118.651	108.238	127.643	121.252	124.885	128.916	126.835	126.538	3.87	n.d.
	34	125.461	128.725	144.935	143.872	129.664	116.878	113.821	129.051	4.20267		148.111	130.537	122.704	106.753	129.498	123.317	125.523	125.871	126.13	126.494	3.55175	n.d.
	34.5	118.514	134.9	147.786	145.609	132.984	120.924	115.863	130.94	4.51954		147.49	138.449	117.759	105.581	133.215	117.962	121.897	128.667	128.778	126.644	4.16042	n.d.
	35	105.15	128.182	151.945	149.985	138.876	129.504	118.414	131.722	5.88025		148.763	137.661	119.356	111.335	130.569	120.784	122.947	128.96	129.457	127.759	3.65835	n.d.
	35.5	114.076	129.284	143.092	147.212	127.486	120.696	111.657	127.643	4.76432		150.474	140.281	117.761	117.357	129.911	119.018	127.919	127.161	131.541	129.047	3.65477	n.d.
	36	119.59	133.275	147.175	140.033	127.188	132.927	107.068	129.608	4.64228		147.312	141.716	115.063	108.688	127.121	124.045	122.345	127.981	126.875	126.794	3.9756	n.d.
	36.5	121.39	129.715	144.459	140.4	138.891	128.45	112.23	130.791	4.00069		149.192	142.995	119.791	108.99	133.778	119.695	126.65	127.071	129.497	128.629	4.09346	n.d.
	37	114.781	134.903	141.87	141.584	136.249	130.763	110.315	130.066	4.42136		150.947	140.013	113.111	114.403	132.587	121.648	125.278	127.166	130.062	128.357	3.9966	n.d.
	37.5	121.996	131.532	137.537	147.973	138.7	137.276	110.846	132.265	4.29953		149.321	144.146	116.263	115.545	136.015	125.603	123.115	126.598	125.453	129.118	3.90731	n.d.
	38	122.474	127.139	147.176	142.697	133.633	123.313	109.937	129.481	4.47121		155.077	142.008	115.001	113.332	134.6	124.22	124.056	127.268	128.469	129.337	4.36468	n.d.
	38.5	126.45	131.446	139.61	140.021	129.528	133.305	118.096	131.208	2.67295		150.456	141.444	108.45	117.674	137.765	123.691	124.958	129.17	128.804	129.157	4.22788	n.d.
	39	133.28	130.796	142.917	142.132	131.897	130.532	107.651	131.315	4.08253		148.862	137.802	105.701	110.29	140.916	122.893	126.773	126.9	126.506	127.405	4.62008	n.d.
	39.5	126.548	131.897	143.79	138.661	136.492	124.826	115.668	131.126	3.3386		153.026	140.027	120.06	115.214	139.242	118.894	125.274	127.94	127.012	129.632	4.06747	n.d.
	40	129.773	130.661	134.825	141.277	134.205	130.91	113.852	130.786	2.94814		150.615	140.906	109.622	111.707	143.54	129.539	128.376	126.249	125.879	129.604	4.57897	n.d.
	40.5	124.861	135.085	140.116	142.986	137.687	128.743	105.563	130.72	4.46623		150.698	140.727	107.238	107.436	135.708	121.237	124.553	126.712	128.931	127.027	4.77574	n.d.
	41	130.271	129.418	137.865	141.818	128.986	125.799	108.247	128.915	3.74039		151.275	139.651	110.391	115.639	135.036	123.106	123.978	125.036	125.228	127.705	4.15946	n.d.
	41.5	117.873	135.14	141.461	144.012	136.927	144.108	106.635	132.308	5.06454		152.166	143.456	110.018	109.982	140.709	124.12	123.807	124.509	126.937	128.412	4.82592	n.d.
	42	128.764	133.46	139.896	145.55	136.409	129.014	118.501	133.085	3.06693		149.643	141.057	106.873	107.607	139.623	115.959	120.318	126.656	127.303	126.116	5.01464	n.d.
	42.5	128.454	133.052	142.664	146.929	136.068	135.481	107.484	132.876	4.45979		155.81	141.961	103.4	109.922	141.037	108.977	123.159	124.15	124.797	125.913	5.82306	n.d.
	43	123.022	127.597	143.142	145.565	136.978	130.844	109.94	131.013	4.31918		152.883	137.523	105.595	110.155	144.966	111.084	124.165	125.683	127.473	126.614	5.41005	n.d.
	43.5	127.832	129.208	148.019	146.687	126.796	127.75	112.513	131.258	4.32954		153.716	140.624	110.229	113.763	140.995	113.829	125.593	126.198	126.647	127.955	4.88722	n.d.
	44	132.434	132.133	149.821	141.1	139.225	130.831	116.999	134.649	3.58585		150.362	138.964	110.457	111.434	138.155	111.473	122.755	126.438	128.096	126.459	4.69531	n.d.
	44.5	136.385	132.454	142.714	134.5	137.318	131.665	103.92	131.279	4.41171		153.272	143.272	105.471	110.025	139.385	103.356	122.053	126.929	124.12	125.32	5.80525	n.d.
	45	123.517	130.771	143.617	142.178	143.526	123.814	105.829	130.465	4.90797		150.689	137.929	109.249	109.537	142.091	109.26	123.514	126.304	128.176	126.306	5.0728	n.d.
	45.5	132.281	134.102	137.061	145.657	135.122	122.77	117.613	132.087	3.25287		154.855	136.447	106.934	109.588	143.274	114.206	122.876	126.911	126.009	126.789	5.29295	n.d.
	46	135.06	132.044	146.529	144.157	141.152	122.396	106.246	132.512	4.96052		151.279	138.633	108.022	114.186	140.444	111.214	123.315	126.831	127.925	126.872	4.84968	n.d.
	46.5	133.547	128.909	141.281	141.13	136.752	114.118	102.526	128.323	5.14667		149.62	138.24	100.931	112.872	141.858	108.47	126.618	124.333	127.529	125.608	5.36371	n.d.
	47	131.545	136.127	139.137	143.799	139.068	128.334	111.031	132.72	3.79813		151.913	137.214	114.209	113.785	145.954	113.625	120.952	124.894	127.199	127.749	4.76876	n.d.
	47.5	131.744	133.48	142.185	138.01	138.943	135.54	111.101	133	3.59311		153.995	135.134	103.793	111.117	140.769	120.018	122.356	125.654	125.23	126.452	5.06606	n.d.
	48	131.827	135.354	140.797	142.789	139.797	126.07	111.862	132.642	3.78955		151.278	140.49	114.672	117.332	148.423	119.015	124.673	125.519	126.919	129.813	4.52757	n.d.
	48.5	130.886	135.871	132.38	150.109	136.818	130.466	102.064	131.228	5.07472		147.867	133.859	100.006	115.788	147.975	115.893	121.085	127.618	126.049	126.238	5.17906	n.d.
	49	130.98	138.334	140.028	147.608	137.864	130.673	105.783	133.039	4.66237		153.22	134.035	102.611	112.31	149.835	117.929	118.487	125.409	126.541	126.709	5.55996	n.d.
	49.5	133.332	136.819	142.007	147.552	137.83	124.062	110.528	133.161	4.32274		151.968	137.158	95.4144	119.515	151.04	113.45	123.368	127.623	128.332	127.541	5.95645	n.d.
	50	134.899	136.705	137.12	139.566	135.376	134.737	104.582	131.855	4.24855		154.231	133.827	108.633	113.721	149.033	118.177	124.77	125.488	129.095	128.553	5.07584	n.d.
	50.5	132.184	139.798	141.39	140.256	139.764	135.02	106.494	133.558	4.33341		152.837	135.608	100.777	119.919	148.256	113.377	120.064	126.084	127.277	127.133	5.48448	n.d.
	51	139.143	138.89	135.072	142.071	144.267	121.358	109.937	132.963	4.41096		152.338	132.946	95.6309	122.331	146.46	120.739	120.76	126.028	130.952	127.576	5.4691	n.d.
	51.5	137.693	135.231	132.64	141.382	137.712	118.65	101.962	129.324	4.93698		151.177	132.755	109.95	114.168	149.685	121.027	123.185	127.187	130.082	128.802	4.74074	n.d.
	52	135.596	136.252	138.617	139.905	136.736	124.517	111.112	131.819	3.64717		149.307	128.048	124.316	113.285	152.057	119.162	122.903	125.434	131.738	129.583	4.35404	n.d.
	52.5	134.665	133.967	131.661	140.421	131.539	123.431	108.868	129.222	3.6047		152.41	130.433	123.851	120.629	144.408	118.24	124.62	127.423	129.902	130.213	3.74366	n.d.
	53	138.285	137.683	135.878	141.215	125.364	140.023	108.723	132.453	4.09218		152.472	128.255	131.082	120.283	149.503	111.501	123.924	127.18	128.728	130.325	4.36485	n.d.
	53.5	137.531	137.759	145.024	139.63	141.011	128.275	103.724	133.279	4.8964		150.376	130.419	124.689	126.922	151.911	118.85	124.35	125.937	125.59	131.005	3.93738	n.d.
	54	137.852	140.542	137.048	136.798	138.918	123.196	101.564	130.845	4.94479		153.616	129.197	130.017	128.398	151.938	118.869	126.391	127.419	129.161	132.779	3.93885	n.d.
	54.5	140.182	138.186	129.16	143.966	141.634	121.983	103.386	131.214	5.07903		154.374	134.034	129.212	128.62	152.048	119.372	121.748	126.166	127.577	132.572	4.15179	n.d.
	55	144.742	137.337	136.336	139.996	134.433	129.644	100.457	131.849	5.11078		150.538	127.772	129.878	121.557	150.719	121.367	123.821	127.157	125.959	130.974	3.82955	n.d.
	55.5	142.588	139.134	134.074	146.091	139.105	127.304	99.9463	132.606	5.46465		152.288	134.146	121.765	120.122	150.215	118.856	120.941	125.481	127.249	130.118	4.28511	n.d.
	56	135.932	142.134	138.999	144.365	138.983	121.764	105.599	132.539	4.88348		150.817	130.089	110.856	125.844	153.74	122.925	125.552	126.899	126.653	130.375	4.51864	n.d.
	56.5	141.245	144.907	134.511	144.156	135.937	122.397	101.003	132.023	5.48586		151.385	135.611	129.609	117.388	152.731	115.647	123.26	128.133	126.092	131.095	4.44742	n.d.
	57	135.555	142.077	132.997	142.638	127.512	120.687	104.596	129.438	4.69796		153.287	133.1	142.625	108.443	155.32	121.907	125.087	125.947	128.525	132.693	5.08268	n.d.
	57.5	134.52	136.428	140.347	144.487	136.208	119.546	105.974	131.073	4.72876		153.492	131.759	137.891	116.863	155.143	125.808	124.1	126.78	125.108	132.994	4.45346	n.d.
	58	141.482	142.324	142.999	145.528	134.528	133.722	103.924	134.93	5.02658		151.068	128.895	149.933	119.133	154.332	123.937	122.836	126.434	129.464	134.003	4.57857	n.d.
	58.5	138.308	147.198	140.039	145.348	126.109	125.872	101.663	132.077	5.54409		152.888	131.326	155.386	117.938	152.345	123.378	122.105	126.698	127.153	134.358	4.95704	n.d.
	59	139.303	138.774	143.848	140.194	125.971	129.164	95.8863	130.449	5.7826		150.868	132.646	175.799	121.521	153.197	121.938	121.38	125.352	126.945	136.627	6.37377	n.d.
	59.5	143.221	141.32	146.179	144.52	141.215	107.779	102.969	132.458	6.52074		154.053	132.76	169.221	116.394	151.33	120.354	122.541	124.814	125.896	135.263	6.1324	n.d.
	60	133.732	141.475	151.385	146.638	138.8	127.346	101.077	134.351	5.83501		152.918	128.191	177.59	118.964	156.499	125.854	123.53	125.001	123.635	136.909	6.78261	n.d.

## Sheet: Fig 4F
Fig. 4F
	Synaptic current amplitude (nA)
	wild type	spastin KO
	-0.796777	-0.397496
	-1.2707	-1.15828
	-0.476193	-1.42024
	-0.809563	-2.07726
	-0.539388	-0.982297
	-1.22236	-0.137883
	-1.46953	-0.94545
	-1.10279	-0.76761
		-0.714087
Mean	-0.960913	-0.955623
Standard deviation	0.359688	0.56896
Standard error of the mean	0.127169	0.189653
Number of cells investigated (n=)	8	9
T-test (p=)	0.982

## Sheet: Fig 4G
Fig. 4G	Synaptic current amplitude (% of control)
	Control		D-APV		D-APV + NBQX
	wild type	spastin KO	wild type	spastin KO	wild type	spastin KO
	100	100	52.7327	60.4073	2.94552	1.15531
	100	100	77.1496	70.2718	1.91789	6.96516
	100	100	43.4566	83.022	5.64479	9.6884
	100	100	66.4411	81.1811	5.85157	2.57105
	100	100	79.6803	48.4562	2.30848	16.8987
	100		103.218		0.855538
	100		55.247		1.53957
Mean	100	100	68.275	68.6677	3.00905	7.45571
Standard deviation	-	-	20.2503	14.5081	1.97946	6.28391
Standard error of the mean	-	-	7.6539	6.48823	0.748165	2.81025
Number of cells investigated (n=)	7	5	7	5	7	5
T-test (p=)			0.971		0.105

## Sheet: Fig 4J
	Cumulative probability
	+/+											-/-
IEI	500	1000	1500	2000	2500	3000	3500	4000	4500	5000		500	1000	1500	2000	2500	3000	3500	4000	4500	5000
	0.850575	0.965517	1	1	1	1	1	1	1	1		0.230769	0.413462	0.576923	0.701923	0.788462	0.865385	0.913462	0.942308	0.951923	1
	0.427835	0.613402	0.757732	0.829897	0.850515	0.907216	0.948454	0.969072	0.989691	1		0.428571	0.428571	0.714286	0.714286	0.714286	0.714286	0.714286	0.857143	0.857143	1
	0.868852	0.978142	1	1	1	1	1	1	1	1		0.21519	0.367089	0.468354	0.531646	0.721519	0.835443	0.898734	0.924051	0.962025	1
	0.405882	0.564706	0.717647	0.823529	0.888235	0.905882	0.952941	0.976471	0.994118	1		0.659574	0.829787	0.893617	0.968085	1	1	1	1	1	1
	0.566667	0.82381	0.928571	0.985714	0.990476	0.990476	0.995238	1	1	1		0.883178	0.990654	1	1	1	1	1	1	1	1
	0.461187	0.716895	0.894977	0.936073	0.972603	0.981735	0.986301	0.990868	0.995434	1		0.630303	0.90303	0.975758	0.987879	0.993939	1	1	1	1	1
	0.755656	0.963801	0.99095	1	1	1	1	1	1	1		0	0.428571	0.714286	0.714286	0.714286	0.714286	1	1	1	1
	0.982143	1	1	1	1	1	1	1	1	1		0.588235	0.808824	0.926471	0.963235	0.985294	0.992647	0.992647	1	1	1
												0.0909091	0.363636	0.727273	0.818182	0.909091	0.909091	0.909091	0.909091	1	1
												0.31	0.49	0.64	0.72	0.81	0.89	0.91	0.98	0.98	1
												0.263158	0.526316	0.631579	0.789474	0.921053	1	1	1	1	1
												0.166667	0.333333	0.333333	0.833333	0.833333	0.833333	1	1	1	1
												0.71028	0.906542	0.957944	0.990654	1	1	1	1	1	1
												0.408046	0.614943	0.718391	0.781609	0.890805	0.942529	0.965517	0.988506	1	1
mean	0.66485	0.828284	0.911235	0.946902	0.962729	0.973164	0.985367	0.992051	0.997405	1		0.39892	0.60034	0.734158	0.822471	0.87729	0.906929	0.950267	0.971507	0.982221	1
SD	0.226586	0.176156	0.114391	0.0772863	0.0592393	0.0416272	0.0219377	0.0124677	0.0039256	0		0.26107	0.23654	0.199623	0.142531	0.112766	0.103289	0.0795935	0.0455188	0.0393566	0
s.e.m.	0.0801104	0.0622806	0.0404432	0.0273248	0.0209443	0.0147174	0.00775615	0.00440801	0.00138791	0		0.069774	0.063218	0.0533515	0.0380929	0.030138	0.0276052	0.0212723	0.0121654	0.0105185	0

## Sheet: Fig 4K
	Frequency (Hz)
	+/+	-/-
	3.8	0.5
	0.86	0.05
	4.2	0.29
	0.66	2
	1.71	3.6
	1.32	2.3
	2.83	0.07
	8.37	1.6
		0.15
		0.45
		0.35
		0.05
		2.3
		0.8
mean	2.96875	1.03643
SD	2.54894	1.12294
s.e.m.	0.901187	0.300118

## Sheet: Fig 4L
	Cumulative probability
	+/+						-/-
IEI	20	40	60	80	100		20	40	60	80	100
	0.6	0.971429	1	1	1		0.464912	0.991228	1	1	1
	0.411168	0.918782	0.994924	1	1		0.375	1	1	1	1
	0.467391	0.826087	0.951087	0.978261	1		0.971963	1	1	1	1
	0.519126	0.989071	1	1	1		0.442105	0.831579	0.957895	1	1
	0.582938	0.938389	0.981043	0.995261	1		0.446512	0.939535	0.986047	0.995349	1
	0.745455	0.995455	1	1	1		0.355422	0.783133	0.975904	0.993976	1
	0.0497512	0.432836	0.666667	0.870647	1		1	1	1	1	1
	0.408889	0.875556	0.991111	1	1		0.218978	0.868613	0.985401	1	1
							0.1875	0.9375	1	1	1
							0.711864	0.991525	1	1	1
							0.285714	0.918367	1	1	1
							0.05	0.9	1	1	1
							0.539535	0.939535	0.995349	0.995349	1
							0.444444	0.861111	0.977778	1	1
mean	0.47309	0.86845	0.948104	0.980521	1		0.463854	0.925866	0.991312	0.998905	1
SD	0.204128	0.185285	0.114905	0.0450268	0		0.273582	0.069636	0.0130682	0.00219751	0
s.e.m.	0.0721703	0.0655081	0.0406251	0.0159194	0		0.0731179	0.018611	0.00349262	0.00058731	0

## Sheet: Fig 4M
	Frequency (Hz)
	+/+	-/-
	19.8	21
	23.5	22.3
	26.3	12.6
	20.8	26.6
	21.3	23.3
	17	28.4
	57.8	9.4
	25.7	28.3
		24.1
		18.2
		24.8
		28.3
		22.1
		25.2
mean	26.525	22.4714
SD	13.0057	5.71926
s.e.m.	4.5982	1.52854
