# Supplementary material for: Spastin depletion increases tubulin polyglutamylation and impairs kinesin-mediated neuronal transport, leading to working and associative memory deficits
Source: PLoS Biol. 2020 Aug 31;18(8):e3000820. doi: 10.1371/journal.pbio.3000820 (PMC7485986; doi:10.1371/journal.pbio.3000820)
Supplement: S5 Data — The file “S5_data.xlsx” consists of several spreadsheets. Each spreadsheet contains the numerical raw data of one subfigure as indicated. (XLSX) [file pbio.3000820.s009.xlsx]

## Sheet: Legend
S5 Data. Individual quantitative observations that underlie the data presented in Figure 5. The file „S5_data.xlsx“ consists of several spreadsheets. Each spreadsheet contains the numerical raw data of one subfigure as indicated.

## Sheet: Fig 5B
	Mean MT fragment length (µm) within ROI
	+/+	-/-
	1.21	1.49
	0.74	1.23
	0.81	1.09
	0.69	0.85
	0.85	1.16
	0.61	1.22
	0.57	0.9
	0.72	1.11
	1.53	1.43
	0.65	1.54
	0.7	1.45
	0.5	1.31
	1.18	1.95
	0.45	1.38
	0.99
	0.97
	0.67
	0.84
	0.85
	0.52
mean	0.8025	1.29357
SD	0.268365	0.282179
s.e.m.	0.0600082	0.0754154

## Sheet: Fig 5C
	Total length of MT fragments (µm) within micrograph
	+/+	-/-
	56.76	37.16
	40.82	61.34
	37.95	130.23
	31.85	36.44
	41.04	47.47
	46.05	37.88
	46.37	18.82
	32.95	19.94
	333.78	48.66
	34.43	46.3
	31.32	75.64
	20.84	30.05
	31.82	38.92
	32.09	81.42
	33.5
	49.68
	18.18
	21.72
	40.91
	40.4
mean	51.123	50.7336
SD	67.2241	29.2425
s.e.m.	15.0318	7.81539

## Sheet: Fig 5D
	Mean distance between MT fragments (µm)
	+/+	-/-
	0.15	0.12
	0.17	0.12
	0.13	0.1
	0.13	0.09
	0.15	0.29
	0.14	0.1
	0.15	0.09
	0.15	0.1
	0.14	0.09
	0.14	0.11
	0.17	0.13
	0.17	0.1
	0.15	0.12
	0.15	0.1
	0.14
	0.17
	0.12
	0.12
	0.19
	0.18
mean	0.1505	0.118571
SD	0.0193241	0.0509686
s.e.m.	0.004321	0.0136219

## Sheet: Fig 5F
	No. of comets/30µm
	+/+	-/-
	5	1.5
	1	1.4
	4	1.8
	4	4.1
	3	3.1
	2	1.3
	3	1.5
	2	3.1
	2	1.2
	2	4.8
	5	2.2
	6	2.2
	3	0.7
	6	2.5
	6
mean	3.6	2.24286
SD	1.68184	1.17324
s.e.m.	0.434248	0.313561

## Sheet: Fig 5G
	EB3 velocity (µm/s)
	+/+	-/-
	Control	Control	Spast-WT	Spast-K388R
	0.199	0.178	0.184	0.308
	0.105	0.41	0.0214	0.249
	0.107	0.344	0.243	0.391
	0.109	0.348	0.342	0.348
	0.29	0.392	0.274	0.324
	0.196	0.382	0.219	0.235
	0.177	0.265	0.269	0.331
	0.156	0.248	0.388	0.25
	0.212	0.201	0.231	0.39
	0.25	0.138	0.315	0.447
	0.2	0.414	0.272	0.397
	0.33	0.278	0.25	0.239
	0.176	0.418	0.24	0.444
	0.0965	0.486	0.26	0.228
	0.246	0.426	0.263	0.364
	0.193	0.0443	0.216	0.329
	0.251	0.334	0.282	0.423
	0.214	0.365	0.0257	0.379
	0.19	0.257	0.303	0.256
	0.186	0.168	0.228	0.28
	0.229	0.382	0.183	0.281
	0.178	0.423	0.231	0.161
	0.459	0.434	0.166	0.161
	0.405	0.301	0.197	0.187
	0.305	0.253	0.229	0.253
	0.281	0.187	0.197	0.225
	0.304	0.104	0.368	0.164
	0.295	0.172	0.206	0.281
	0.23	0.376	0.203	0.183
	0.202	0.23	0.343	0.239
	0.169	0.278	0.337	0.225
	0.256	0.389	0.344	0.29
	0.273	0.276	0.244	0.0208
	0.243	0.244	0.278	0.297
	0.249	0.208	0.272	0.267
	0.301	0.173	0.236	0.204
		0.159	0.165	0.129
		0.273	0.165	0.229
		0.264	0.282	0.257
		0.351	0.191	0.166
		0.322	0.301	0.129
		0.251	0.273	0.3
		0.245		0.122
		0.279		0.338
		0.25		0.232
		0.275		0.281
		0.0159		0.263
		0.203		0.166
		0.292
		0.272
		0.125
		0.228
		0.028
		0.222
		0.361
		0.279
		0.349
		0.298
		0.321
		0.298
		0.263
		0.018
		0.167
		0.282
		0.165
		0.321
		0.609
		0.322
		0.369
		0.321
		0.141
		0.332
		0.0401
		0.219
		0.268
		0.326
		0.17
		0.285
		0.062
		0.141
mean	0.229514	0.266354	0.24374	0.263808
SD	0.078177	0.111857	0.0749502	0.0907032
s.e.m.	0.0130295	0.012506	0.0115651	0.0130919

## Sheet: Fig 5H
	EB3 growth distance (µm)
	+/+	-/-
	Control	Control	Spast-WT	Spast-K388R
	1.29	2.485	0.85	1.14
	0.885	3.405	0.44	2.76
	2.825	3.44	2.68	4.76
	0.283	2.16	2.92	7.15
	2.935	2.62	2.61	2.32
	2.585	6.645	0.67	4.26
	2.44	2.805	2.35	0.226
	2.84	1.27	1.405	5.69
	0.31	1.97	3.29	3.34
	1.34	1.58	1.45	3.69
	0.57	6.89	4.34	3.92
	0.755	1.47	3.39	3.68
	0.655	3.625	3.115	7.18
	1	4.145	3.485	8.33
	1.335	4.615	3.34	7.18
	0.7	3.58	0.6	2.29
	1.32	4.735	1.485	2.5
	0.92	4.02	2.49	3.87
	2.67	1.25	1.36	6.69
	2.36	6.94	2.975	4.74
	2.145	2.725	2.86	4.08
	1.81	3.585	3.28	7.69
	3.91	3.645	1.61	3.46
	0.175	3.35	2.045	3.07
	3.445	2.03	2.785	4.38
	2.8	5.865	1.88	5.41
	1.29	2.535	1.65	4.38
	2.39	2.935	2.42	5.16
	1.17	2.96	1.745	1.05
	1	2.11	3.745	3.08
	1.965	4.67	1.125	5.49
	2.24	2.205	2.68	4.45
	3.24	2.095	2.03	6.63
	2.34	5.975	0.23	4.24
	2.72	3.055	2.795	3.15
	1.47	3.32	2.98	1.19
		4.145	0.69	2.42
		3.48	2.52	2.25
		2.91	2.545	3.22
		3.315	1.825	4.51
		3.855	1.065	4.26
		4.565	0.655	8.06
		2.49		1.4
		2.92		6
		2.54		2.6
		3.58		7.05
		2.51		3.86
		3.46		8.41
		3.57
		4.49
		3.58
		1.51
		3.225
		2.875
		2.065
		6.44
		5.355
		3.635
		3.12
		4.555
		1.7
		4.94
		4.5
		2.685
		2.19
		3.04
		2.33
		3.43
		3.62
		1.56
		3.77
		5.51
		4.41
		3.795
		4.135
		2.84
		2.975
		3.05
		5.38
		5.095
mean	1.78133	3.47319	2.1525	4.30554
SD	0.991764	1.31599	1.0202	2.05638
s.e.m.	0.165294	0.147132	0.15742	0.296813

## Sheet: Fig 5J
	poly-Glu Tub/total Tub
	+/+	-/-
	0.72	1.5
	0.81	1.14
	1.07	1.08
	0.79	1.03
	0.99	1.02
	0.76	1.53
	0.85	1.62
	0.78	1.74
	0.75	1.7
mean	0.835556	1.37333
SD	0.11791	0.301206
s.e.m.	0.0393033	0.100402

## Sheet: Fig 5L
	Relative intensity (%)
	+/+	-/-
	100	181.292
	100	189.176
	100	204.155
	100	161.382
mean	100	184.001
SD	0	17.8132
s.e.m.	0	8.90659
